# Supplementary material for: Mutation spectrum of NOD2 reveals recessive inheritance as a main driver of Early Onset Crohn’s Disease
Source: PubMed Central journal article supplement (PMC7946957; doi:10.1038/s41598-021-84938-8), 2021-03-10
Supplement: 41598_2021_84938_MOESM1_ESM.pdf [file 41598_2021_84938_MOESM1_ESM.pdf]

## Supplementary Information for:

### Mutation spectrum of *NOD2* reveals recessive inheritance as a main driver of Early Onset Crohn's Disease

Julie E. Horowitz, Ph.D.<sup>1</sup>, Neil Warner, Ph.D.<sup>2,3</sup>, Jeffrey Staples, Ph.D.<sup>1</sup>, Eileen Crowley, M.D.<sup>2,3</sup>,  
Nehal Gosalia, Ph.D.<sup>1</sup>, Ryan Murchie, M.Sc.<sup>2,3</sup>, Cristopher Van Hout, Ph.D.<sup>1</sup>, Karoline Fiedler<sup>2,3</sup>,  
Gabriel Welch<sup>1</sup>, Alejandra Klauer King, Ph.D.<sup>1</sup>, Jeffrey G. Reid, Ph.D.<sup>1</sup>, John D. Overton, Ph.D.<sup>1</sup>,  
Aris Baras, M.D.<sup>1</sup>, Alan R. Shuldiner, M.D.<sup>1</sup>, Anne Griffiths, M.D.<sup>2</sup>, Omri Gottesman, M.D.<sup>1</sup>,  
Aleixo M. Muise, M.D., Ph.D.<sup>2,3,4,\*</sup>, Claudia Gonzaga-Jauregui, Ph.D.<sup>1,\*</sup>

<sup>1</sup> Regeneron Genetics Center, Regeneron Pharmaceuticals Inc., Tarrytown, NY, USA

<sup>2</sup> SickKids Inflammatory Bowel Disease Center, Hospital for Sick Children, Toronto, ON,  
Canada

<sup>3</sup> Cell Biology Program, Research Institute, Hospital for Sick Children, Toronto, ON, Canada.

<sup>4</sup> Departments of Pediatrics and Biochemistry, University of Toronto, Toronto, ON, Canada.

\*Co-corresponding authors

**Figure S1. Example pedigrees for homozygous and compound heterozygous *NOD2* carriers in an early onset IBD cohort.** Example pedigrees *NOD2* variants identified in families with pediatric onset IBD. Diagnosis and age at diagnosis are indicated for the affected probands (filled dark grey symbols); unaffected relatives are depicted as unfilled symbols.

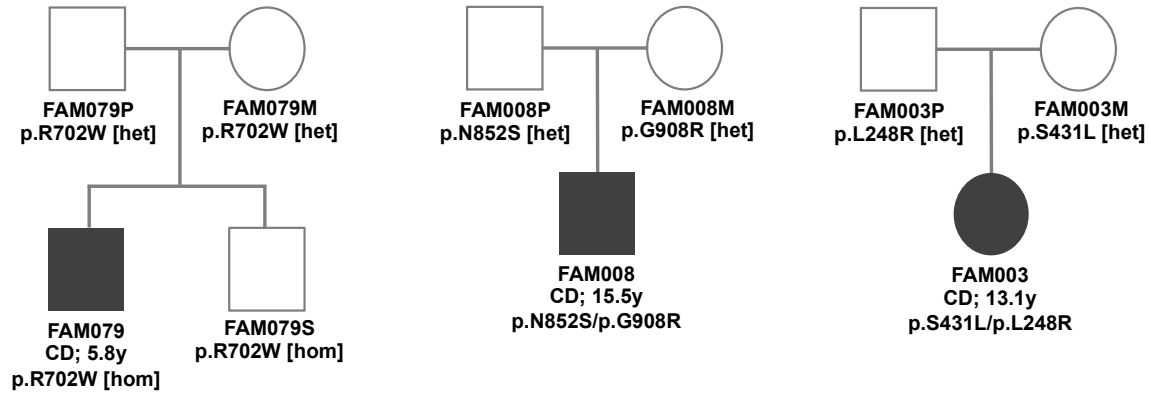

**Figure S2. Example pedigrees for homozygous and compound heterozygous *NOD2* carriers in the RGC-GHS DiscovEHR cohort.** Diagnosis indicated for the affected probands (filled dark grey symbols); unaffected relatives are depicted as unfilled symbols; individuals not sequenced are depicted as light grey symbols.

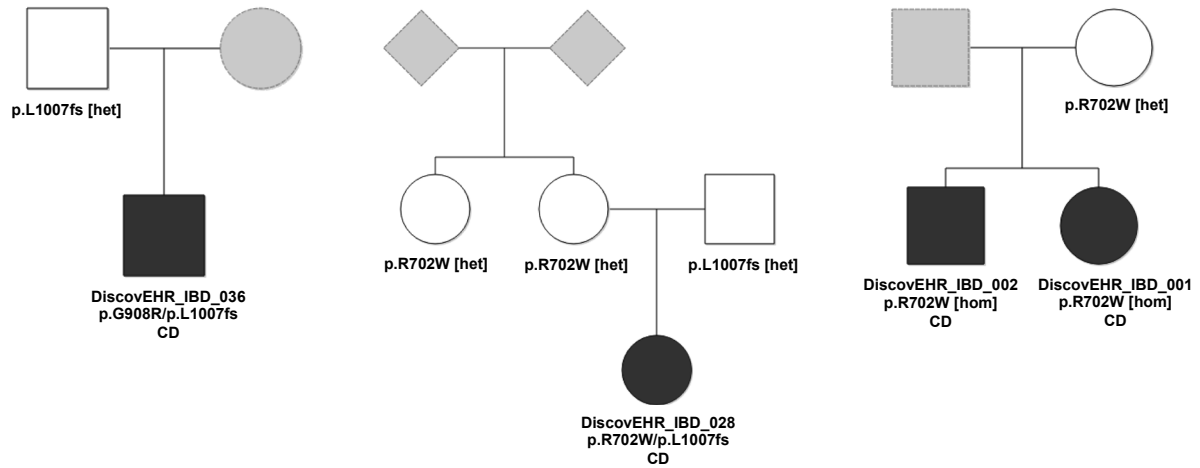

**Figure S3. Exome sequencing coverage across the *NOD2* gene.** Exon coverage and performance for all exons of the *NOD2* gene using the Nimblegen VCRome 2.1 target design.

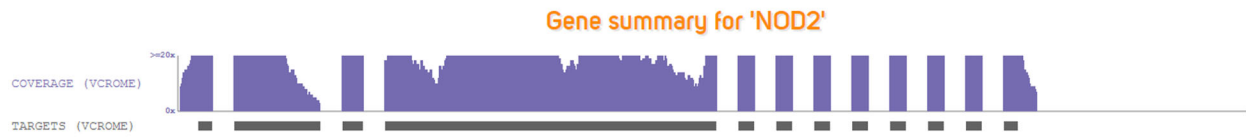

**Supplementary Tables:**

**Table S1. Clinical phenotypes of 92 early onset IBD probands carrying recessive *NOD2* variants.**

**Table S2. Clinical phenotype summaries for 92 early onset IBD probands carrying recessive *NOD2* variants.**

**Table S3. Clinical phenotypes of recessive *NOD2* carriers in the RGC-GHS DiscovEHR adult IBD cohort.** Cases diagnosed  $\leq 18$ y are highlighted in dark grey, and diagnosis  $\leq 30$ y are highlighted in light grey.

**Table S4. Genomic coordinates, annotation, frequencies, and bioinformatic prediction scores for *NOD2* variants identified in this study.**
